# Supplementary material for: The effect of declining exposure on T cell-mediated immunity to Plasmodium falciparum – an epidemiological “natural experiment”
Source: PubMed Central journal article supplement (PMC5034532; doi:10.1186/s12916-016-0683-6), 2016-09-22

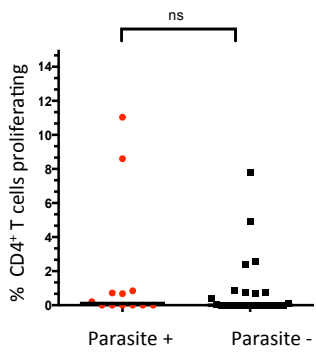

Supplement: 12916_2016_683_MOESM3_ESM.pdf [file 12916_2016_683_MOESM3_ESM.pdf]
